# Supplementary material
Source: PubMed Central journal article supplement (PMC3859316)
Supplement: NIHMS530130-supplement-01.pdf [file NIHMS530130-supplement-01.pdf]

**Table S1. Bivalent shape and calculated chiasma frequency**

| Line (ploidy)     | Cell# | Rods        | Rings       | Multi.      | Uni.       | Chiasmata/pair |
|-------------------|-------|-------------|-------------|-------------|------------|----------------|
| SN23 (2X)         | 1     | 7           | 1           | 0           | 0          | 1.125          |
|                   | 2     | 6           | 2           | 0           | 0          | 1.25           |
|                   | 3     | 5           | 3           | 0           | 0          | 1.375          |
|                   | 4     | 4           | 4           | 0           | 0          | 1.5            |
|                   | 5     | 5           | 3           | 0           | 0          | 1.375          |
|                   | 6     | 3           | 5           | 0           | 0          | 1.625          |
|                   | 7     | 3           | 3           | 1           | 0          |                |
|                   | 8     | 8           | 0           | 0           | 0          | 1              |
|                   | 9     | 8           | 0           | 0           | 0          | 1              |
|                   | 10    | 6           | 0           | 1           | 0          |                |
|                   | 11    | 7           | 1           | 0           | 0          | 1.125          |
|                   | 12    | 5           | 3           | 0           | 0          | 1.375          |
|                   | 13    | 6           | 2           | 0           | 0          | 1.25           |
|                   | 14    | 5           | 3           | 0           | 0          | 1.375          |
|                   | 15    | 4           | 4           | 0           | 0          | 1.5            |
|                   | 16    | 2           | 6           | 0           | 0          | 1.75           |
|                   | 17    | 2           | 6           | 0           | 0          | 1.75           |
|                   | 18    | 5           | 3           | 0           | 0          | 1.375          |
|                   | 19    | 7           | 1           | 0           | 0          | 1.125          |
|                   | 20    | 4           | 4           | 0           | 0          | 1.5            |
|                   | 21    | 5           | 3           | 0           | 0          | 1.375          |
|                   | 22    | 1           | 7           | 0           | 0          | 1.875          |
|                   | 23    | 0           | 8           | 0           | 0          | 2              |
|                   | 24    | 5           | 3           | 0           | 0          | 1.375          |
|                   | 25    | 5           | 2           | 0           | 2          | 1.125          |
|                   | 26    | 4           | 4           | 0           | 0          | 1.5            |
|                   | 27    | 6           | 2           | 0           | 0          | 1.25           |
|                   | 28    | 7           | 1           | 0           | 0          | 1.125          |
|                   | 29    | 7           | 1           | 0           | 0          | 1.125          |
|                   | 28    | 3           | 5           | 0           | 0          | 1.625          |
|                   | 29    | 5           | 3           | 0           | 0          | 1.375          |
|                   | 30    | 4           | 4           | 0           | 0          | 1.5            |
|                   | 31    | 5           | 3           | 0           | 0          | 1.375          |
|                   | 32    | 7           | 1           | 0           | 0          | 1.125          |
|                   | 33    | 4           | 4           | 0           | 0          | 1.5            |
| 34                | 6     | 2           | 0           | 0           | 1.25       |                |
| 35                | 4     | 4           | 0           | 0           | 1.5        |                |
| SN29 (2X)         | 1     | 8           | 0           | 0           | 0          | 1              |
|                   | 2     | 5           | 3           | 0           | 0          | 1.375          |
|                   | 3     | 6           | 1           | 0           | 2          | 1              |
| <b>2X average</b> |       | <b>4.98</b> | <b>2.88</b> | <b>0.05</b> | <b>0.1</b> | <b>1.36</b>    |
| TBG 1 (4X)        | 1     | 10          | 0           | 1           | 1          |                |
|                   | 2     | 15          | 0           | 0           | 2          | 0.9375         |
|                   | 3     | 12          | 1           | 0           | 6          | 0.875          |
|                   | 4     | 8           | 4           | 1           | 0          |                |
|                   | 5     | 14          | 2           | 0           | 0          | 1.125          |
|                   | 6     | 15          | 1           | 0           | 0          | 1.0625         |
|                   | 7     | 14          | 2           | 0           | 0          | 1.125          |
|                   | 8     | 15          | 2           | 0           | 0          | 1.1875         |
|                   | 9     | 12          | 2           | 0           | 4          | 1              |
|                   | 10    | 14          | 1           | 0           | 2          | 1              |
|                   | 11    | 15          | 1           | 0           | 0          | 1.0625         |
|                   | 12    | 13          | 2           | 0           | 2          | 1.0625         |
|                   | 13    | 15          | 0           | 0           | 2          | 0.9375         |
|                   | 14    | 14          | 2           | 0           | 0          | 1.125          |
|                   | 15    | 14          | 2           | 0           | 2          | 1.125          |
|                   | 16    | 15          | 0           | 0           | 2          | 0.9375         |
| TBG 6 (4X)        | 1     | 14          | 1           | 0           | 2          | 1              |
| TBG 2 (4X)        | 1     | 14          | 2           | 0           | 0          | 1.125          |
|                   | 2     | 14          | 2           | 0           | 0          | 1.125          |
|                   | 3     | 15          | 1           | 0           | 0          | 1.0625         |

|                      | 4     | 12          | 3          | 0           | 2           | 1.125          |
|----------------------|-------|-------------|------------|-------------|-------------|----------------|
|                      | 5     | 14          | 2          | 0           | 0           | 1.125          |
| Line (ploidy)        | Cell# | Rods        | Rings      | Multi.      | Uni.        | Chiasmata/pair |
|                      | 6     | 14          | 2          | 0           | 0           | 1.125          |
|                      | 7     | 15          | 0          | 0           | 2           | 0.9375         |
|                      | 8     | 14          | 2          | 0           | 0           | 1.125          |
|                      | 9     | 13          | 3          | 0           | 0           | 1.1875         |
|                      | 10    | 16          | 0          | 0           | 0           | 1              |
|                      | 11    | 12          | 4          | 0           | 0           | 1.25           |
|                      | 12    | 13          | 3          | 0           | 0           | 1.1875         |
|                      | 13    | 12          | 3          | 0           | 2           | 1.125          |
|                      | 14    | 16          | 0          | 0           | 0           | 1              |
|                      | 15    | 13          | 3          | 0           | 0           | 1.1875         |
|                      | 16    | 15          | 1          | 0           | 0           | 1.0625         |
|                      | 17    | 16          | 0          | 0           | 0           | 1              |
|                      | 18    | 15          | 1          | 0           | 0           | 1.0625         |
|                      | 19    | 6           | 5          | 2           | 0           |                |
|                      | 20    | 14          | 1          | 0           | 2           | 1              |
|                      | 21    | 14          | 2          | 0           | 0           | 1.125          |
|                      | 22    | 13          | 3          | 0           | 0           | 1.1875         |
|                      | 23    | 14          | 2          | 0           | 0           | 1.125          |
|                      | 24    | 13          | 3          | 0           | 0           | 1.1875         |
|                      | 25    | 15          | 1          | 0           | 0           | 1.0625         |
|                      | 26    | 12          | 4          | 0           | 0           | 1.25           |
|                      | 27    | 13          | 3          | 0           | 0           | 1.1875         |
|                      | 28    | 11          | 3          | 1           | 0           |                |
| <b>4X average</b>    |       | <b>13.5</b> | <b>1.8</b> | <b>0.11</b> | <b>0.72</b> | <b>1.09</b>    |
| C 22 (neo 4x)        | 1     | 0           | 0          | 1           | 0           | n/a            |
|                      | 2     | 0           | 0          | 1           | 0           | n/a            |
|                      | 3     | 2           | 0          | 1           | 0           | n/a            |
|                      | 4     | 2           | 1          | 1           | 0           | n/a            |
|                      | 5     | 0           | 1          | 1           | 0           | n/a            |
|                      | 6     | 0           | 0          | 1           | 0           | n/a            |
|                      | 7     | 0           | 0          | 1           | 0           | n/a            |
|                      | 8     | 0           | 0          | 1           | 0           | n/a            |
|                      | 9     | 0           | 0          | 1           | 0           | n/a            |
|                      | 10    | 0           | 0          | 1           | 0           | n/a            |
|                      | 11    | 2           | 0          | 1           | 0           | n/a            |
| C 41 (neo 4X)        | 1     | 0           | 0          | 1           | 0           | n/a            |
|                      | 2     | 0           | 0          | 1           | 0           | n/a            |
|                      | 3     | 0           | 0          | 1           | 0           | n/a            |
|                      | 4     | 0           | 0          | 1           | 0           | n/a            |
|                      | 5     | 0           | 0          | 1           | 0           | n/a            |
|                      | 6     | 0           | 0          | 1           | 0           | n/a            |
|                      | 7     | 0           | 0          | 1           | 0           | n/a            |
|                      | 8     | 0           | 0          | 1           | 0           | n/a            |
|                      | 9     | 0           | 0          | 1           | 0           | n/a            |
|                      | 10    | 0           | 0          | 1           | 0           | n/a            |
|                      | 11    | 0           | 0          | 1           | 0           | n/a            |
|                      | 12    | 0           | 0          | 1           | 0           | n/a            |
| <b>neo4X average</b> |       | <b>0.26</b> | <b>0.1</b> | <b>1</b>    | <b>0</b>    | <b>n/a</b>     |

Table S1 notes: Observed cytological configurations in diploids (2X), tetraploids (4X), and colchicine-doubled lines (neo4X). Diploids and tetraploids have a significantly different number of rod and ring bivalents (One-way ANOVA  $p < 0.0001$ ).

**Table S2. Sampling and sequencing information**

| <u>individual</u> | <u>Site</u>            | <u>GPS</u>                   | <u>reads</u> | <u>read<br/>lqth</u> | <u>single or<br/>paired</u> |
|-------------------|------------------------|------------------------------|--------------|----------------------|-----------------------------|
| TBG8              | Triberg, Germany       | 48° 8' 23" N, 8° 14' 12" E   | 95,657,023   | 101                  | single                      |
| US7               | Bad Urach, Germany     | 48° 28' 31" N, 9° 23' 44" E  | 78,606,294   | 101                  | single                      |
| US24              | Bad Urach, Germany     | 48° 28' 31" N, 9° 23' 44" E  | 88,087,206   | 101                  | single                      |
| BGS4              | Berchtesgaden, Germany | 47° 37' 41" N, 13° 0' 06" E  | 88,764,962   | 101                  | single                      |
| BGS11             | Berchtesgaden, Germany | 47° 37' 41" N, 13° 0' 06" E  | 71,286,294   | 101                  | single                      |
| BGS19             | Berchtesgaden, Germany | 47° 37' 41" N, 13° 0' 06" E  | 72,344,882   | 101                  | single                      |
| KA6               | Kasparstein, Austria   | 46° 41' 18" N, 14° 52' 18" E | 62,520,747   | 101                  | single                      |
| KA2               | Kasparstein, Austria   | 46° 41' 18" N, 14° 52' 18" E | 93,415,527   | 101                  | single                      |
| KA30              | Kasparstein, Austria   | 46° 41' 18" N, 14° 52' 18" E | 66,224,696   | 101                  | single                      |
| BE                | Beuron, Germany        | 48° 03' 25" N, 8° 59' 05" E  | 22,994,132   | 85                   | single                      |
| RF                | Neidlingen, Germany    | 48° 06' 04" N, 9° 03' 02" E  | 23,860,199   | 85                   | single                      |
| US1               | Bad Urach, Germany     | 48° 28' 31" N, 9° 23' 44" E  | 21,625,553   | 85                   | single                      |
| MT                | Seeburg, Germany       | 48° 26' 33" N, 9° 27' 54" E  | 19,949,301   | 85                   | single                      |
| DFS               | Deadfalls, Sweden      | 62° 55' 20" N, 15° 57' 30" E | 16,663,053   | 85                   | single                      |
| TB7               | Triberg, Germany       | 48° 8' 23" N, 8° 14' 12" E   | 15,765,954   | 85                   | single                      |
| TBU3              | Triberg, Germany       | 48° 8' 23" N, 8° 14' 12" E   | 15,621,195   | 85                   | single                      |
| CAI18             | Hnilčák, Slovakia      | 48° 52' 21" N, 20° 31' 30" E | 48,518,042   | 52                   | single                      |
| CAI21             | Hnilčák, Slovakia      | 48° 52' 21" N, 20° 31' 30" E | 57,701,492   | 52                   | single                      |
| CAI6              | Hnilčák, Slovakia      | 48° 52' 21" N, 20° 31' 30" E | 40,497,742   | 52                   | single                      |
| CAIX              | Hnilčák, Slovakia      | 48° 52' 21" N, 20° 31' 30" E | 35,905,817   | 52                   | single                      |
| SN23              | Strečno, Slovakia      | 49° 10' 27" N, 18° 51' 42" E | 46,356,422   | 52                   | single                      |
| SN3               | Strečno, Slovakia      | 49° 10' 27" N, 18° 51' 42" E | 68,707,978   | 52                   | single                      |
| SN9               | Strečno, Slovakia      | 49° 10' 27" N, 18° 51' 42" E | 36,489,721   | 52                   | single                      |
| SN8               | Strečno, Slovakia      | 49° 10' 27" N, 18° 51' 42" E | 104,755,747  | 101                  | paired                      |

Table S2 notes: Data from individuals in rows 1-9, 12, 15, 16 are also described in [11]. Read number is the number of reads per sample that passed quality thresholds. All raw data are available through the NCBI SRA database under project SRP021057.

**Table S4: Overlap list of top 0.5% outliers for CLR and Diversity/differentiation residuals**

| Chr | start    | end      | A. lyrata identifier          | ATG ID    | Name         | Description                                   | Res    | CLR   |
|-----|----------|----------|-------------------------------|-----------|--------------|-----------------------------------------------|--------|-------|
| 1   | 222786   | 223811   | Al_scaffold_0001_57           | AT1G01690 | PRD3         | Spo11-accessory protein                       | -0.075 | 211.5 |
| 1   | 6576455  | 6577852  | fgenes2_kg.1_1711_AT1G15570.1 | AT1G15570 | CYCA2;3      | Cyclin, regulator of endopolyploidy           | -0.156 | 185.6 |
| 1   | 6577857  | 6579852  | fgenes2_kg.1_1712_AT1G15580.1 | AT1G15580 | IAA5         | Auxin-induced protein                         | -0.174 | 221.4 |
| 1   | 9779128  | 9780172  | NA                            | AT1G22260 | <b>ZYP1a</b> | <b>Transverse filament of SC</b>              | -0.079 | 224.9 |
| 1   | 9780176  | 9781176  | NA                            | AT1G22260 | <b>ZYP1a</b> | <b>Transverse filament of SC</b>              | -0.125 | 223.4 |
| 1   | 9781180  | 9783857  | NA                            | AT1G22260 | <b>ZYP1a</b> | <b>Transverse filament of SC</b>              | -0.215 | 260.6 |
| 1   | 9783922  | 9787727  | scaffold_102525.1             | AT1G22275 | <b>ZYP1b</b> | <b>Transverse filament of SC</b>              | -0.133 | 234.5 |
| 1   | 12958080 | 12958873 | fgenes2_kg.1_3100_AT1G29370.1 | AT1G29370 | -            | Kinase-related protein                        | -0.105 | 187.6 |
| 1   | 12959745 | 12960507 | fgenes2_kg.1_3100_AT1G29370.1 | AT1G29370 | -            | Kinase-related protein                        | -0.126 | 189.6 |
| 1   | 12960508 | 12961616 | fgenes2_kg.1_3100_AT1G29370.1 | AT1G29370 | -            | Kinase-related protein                        | -0.118 | 189.6 |
| 1   | 12961617 | 12963831 | Al_scaffold_0001_2996         | AT1G29380 | -            | Carbohydrate-binding X8                       | -0.104 | 197.4 |
| 1   | 14235903 | 14260051 | fgenes1_pg.C_scaffold_1002808 | NA        | -            | -                                             | -0.078 | 209.2 |
| 2   | 289714   | 292779   | Al_scaffold_0002_48           | NA        | -            | -                                             | -0.141 | 205.6 |
| 2   | 795302   | 796894   | fgenes2_kg.2_121_AT1G63640.1  | AT1G63640 | -            | P-loop hydrolase; microtubule motor           | -0.079 | 196.5 |
| 2   | 12428843 | 12430439 | scaffold_201546.1             | AT1G67370 | <b>ASY1</b>  | <b>Axis-associated protein</b>                | -0.146 | 193.8 |
| 2   | 13554321 | 13555490 | fgenes1_pg.C_scaffold_2001247 | AT1G69070 | -            | unknown                                       | -0.113 | 200.1 |
| 2   | 17692431 | 17694023 | Al_scaffold_0002_2462         | AT1G77550 | -            | tubulin-tyrosine ligase                       | -0.084 | 184.9 |
| 2   | 17706277 | 17708050 | scaffold_202722.1             | AT1G77600 | <b>PDS5</b>  | <b>ARM-repeat / PDS5-like, cohesin</b>        | -0.181 | 221.3 |
| 2   | 17712959 | 17714821 | scaffold_202722.1             | AT1G77600 | <b>PDS5</b>  | <b>ARM-repeat / PDS5-like, cohesin</b>        | -0.196 | 222.5 |
| 3   | 1299873  | 1304202  | NA                            | NA        | -            | -                                             | -0.157 | 270.1 |
| 3   | 1491312  | 1493335  | fgenes1_pm.C_scaffold_3000324 | AT3G04450 | -            | Homeodomain protein                           | -0.133 | 192.7 |
| 3   | 1568349  | 1570637  | fgenes2_kg.3_418_AT3G04590.2  | AT3G04590 | -            | AT hook DNA-binding family                    | -0.101 | 204.3 |
| 3   | 1842291  | 1844544  | NA                            | NA        | -            | -                                             | -0.099 | 209.1 |
| 3   | 5073655  | 5076483  | fgenes2_kg.3_1330_AT3G12690.1 | AT3G12690 | AGC1.5       | Serine/threonine kinase, pollen-specific      | -0.123 | 185.7 |
| 3   | 7247564  | 7249853  | fgenes1_pm.C_scaffold_3001478 | NA        | -            | -                                             | -0.193 | 267.4 |
| 4   | 11129868 | 11131556 | fgenes1_pg.C_scaffold_4000806 | AT2G27170 | <b>SMC3</b>  | <b>Member of A. th cohesin complex</b>        | -0.074 | 193.8 |
| 4   | 14217398 | 14218895 | fgenes1_pm.C_scaffold_4000859 | AT2G30480 | -            | unknown                                       | -0.155 | 217.3 |
| 4   | 14218903 | 14219870 | fgenes1_pm.C_scaffold_4000859 | AT2G30480 | -            | unknown                                       | -0.148 | 233.9 |
| 4   | 14219874 | 14220748 | fgenes1_pm.C_scaffold_4000859 | AT2G30480 | -            | unknown                                       | -0.124 | 206.2 |
| 4   | 16059402 | 16061575 | fgenes2_kg.4_1400_AT2G33845.1 | AT2G33845 | -            | Nucleic acid-binding, OB-fold-like            | -0.110 | 192.8 |
| 4   | 20155641 | 20162893 | Al_scaffold_0004_2751         | NA        | -            | -                                             | -0.111 | 308.3 |
| 4   | 21984594 | 21985882 | fgenes1_pm.C_scaffold_4002225 | AT1G65680 | -            | Expansin B2                                   | -0.134 | 251.9 |
| 4   | 21985898 | 21988588 | fgenes1_pm.C_scaffold_4002225 | AT1G65680 | -            | Expansin B2                                   | -0.140 | 226.1 |
| 4   | 21988589 | 21990711 | NA                            | NA        | -            | -                                             | -0.073 | 187.1 |
| 4   | 22000277 | 22001034 | fgenes2_kg.4_2707_AT2G45140.1 | AT2G45140 | PVA12        | ER-localized VAMP-associated                  | -0.072 | 196.5 |
| 4   | 22843177 | 22846825 | fgenes2_kg.4_2929_AT2G46980.2 | AT2G46980 | <b>ASY3</b>  | <b>required for normal meiosis</b>            | -0.125 | 187.8 |
| 4   | 22846865 | 22848680 | fgenes2_kg.4_2929_AT2G46980.2 | AT2G46980 | <b>ASY3</b>  | <b>required for normal meiosis</b>            | -0.274 | 275.6 |
| 4   | 22846865 | 22851541 | fgenes2_kg.4_2929_AT2G46980.2 | AT2G46980 | <b>ASY3</b>  | <b>required for normal meiosis</b>            | -0.297 | 313.1 |
| 5   | 9482240  | 9483838  | fgenes1_pm.C_scaffold_5000607 | AT3G42640 | HA8          | H+ ATPase                                     | -0.122 | 206.2 |
| 5   | 9483841  | 9485667  | fgenes1_pm.C_scaffold_5000607 | AT3G42640 | HA8          | H+ ATPase                                     | -0.211 | 290.5 |
| 5   | 16015301 | 16017248 | fgenes2_kg.5_1585_AT3G52280.1 | AT3G52280 | GTE6         | General transcription factor                  | -0.206 | 223.8 |
| 6   | 987180   | 994021   | fgenes2_kg.6_252_AT5G03430.1  | AT5G03430 | -            | PAPS reductase                                | -0.082 | 190.3 |
| 6   | 2002848  | 2004254  | fgenes1_pm.C_scaffold_6000400 | AT5G05490 | <b>SYN1</b>  | <b>REC8/RAD21-like, essential for meiosis</b> | -0.130 | 201.9 |
| 6   | 2004261  | 2005868  | fgenes1_pm.C_scaffold_6000400 | AT5G05490 | <b>SYN1</b>  | <b>REC8/RAD21-like, essential for meiosis</b> | -0.140 | 261.2 |
| 6   | 8101667  | 8103395  | scaffold_602007.1             | AT5G19180 | ECR1         | Part of ubiquitin-activating complex          | -0.075 | 203.2 |
| 6   | 8862067  | 8865140  | scaffold_602187.1             | AT5G20890 | -            | TCP-1/cpn60 chaperonin protein                | -0.068 | 187.6 |
| 6   | 14370559 | 14373157 | fgenes2_kg.6_2803_AT5G28900.1 | AT5G28850 | -            | Calcium-binding EF-hand protein               | -0.095 | 263.0 |
| 7   | 36874    | 39896    | fgenes2_kg.7_13_AT4G38210.1   | AT4G38210 | EXPA20       | Expansin A20                                  | -0.074 | 207.7 |
| 7   | 7507538  | 7509803  | fgenes2_kg.7_1815_AT4G24610.1 | AT4G24610 | -            | unknown                                       | -0.074 | 191.7 |
| 7   | 10777841 | 10778735 | fgenes2_kg.7_2443_AT4G18490.1 | AT4G18490 | -            | unknown                                       | -0.136 | 248.6 |
| 7   | 10779762 | 10780840 | fgenes2_kg.7_2443_AT4G18490.1 | AT4G18490 | -            | unknown                                       | -0.150 | 207.3 |
| 7   | 11029171 | 11030985 | Al_scaffold_0007_2373         | AT4G18150 | -            | Kinase-related protein                        | -0.218 | 247.7 |
| 7   | 11030986 | 11034624 | fgenes2_kg.7_2486_AT4G18140.1 | AT4G18140 | SSP4A        | SCP1-like phosphatase                         | -0.189 | 213.9 |
| 8   | 12441481 | 12445896 | fgenes2_kg.8_780_AT5G49020.1  | AT5G49020 | PRMT4A       | Arginine methyltransferase                    | -0.071 | 192.5 |
| 8   | 12445966 | 12447861 | fgenes2_kg.8_780_AT5G49020.1  | AT5G49020 | PRMT4A       | Arginine methyltransferase                    | -0.101 | 228.9 |
| 8   | 14783639 | 14792924 | Al_scaffold_0008_1558         | AT5G51870 | AGL71        | MADS box transcription factor                 | -0.192 | 243.3 |
| 8   | 17033171 | 17034749 | fgenes2_kg.8_1438_AT5G55390.1 | AT5G55390 | EDM2         | Enhanced downy mildew resistance              | -0.096 | 220.1 |
| 8   | 17034761 | 17036048 | fgenes2_kg.8_1438_AT5G55390.1 | AT5G55390 | EDM2         | Enhanced downy mildew resistance              | -0.095 | 234.4 |
| 8   | 20213189 | 20214339 | fgenes2_kg.8_2171_AT5G61865.1 | AT5G61865 | -            | unknown                                       | -0.089 | 206.5 |
| 8   | 20610244 | 20612898 | fgenes2_kg.8_2263_AT5G62640.2 | AT5G62640 | ELF5         | Flowering time regulator                      | -0.095 | 196.8 |

Table S4 notes: Chr = Chromosome number, start = 100 SNP window start position in base pairs, based on A. lyrata v1 genome annotation, end = end of 100 SNP window. A. lyrata identifier = gene name of A. lyrata locus within which 100 SNP window falls, ATG ID = A. thaliana gene identifier based on TAIR10 annotation. Res = residual value from diversity/divergence linear regression, CLR = value from site frequency spectrum analysis. Names of meiosis genes are indicated in bold. Alternating grey and white shading indicates distinct peak regions.

**Table S5: Annotated meiosis-related genes from TAIR 10**

| <i>A. lyrata</i> gene name    | ATG ID    | Name       | Description                                                               |
|-------------------------------|-----------|------------|---------------------------------------------------------------------------|
| Al_scaffold_0001_57           | AT1G01690 | PRD3       | plant-specific protein involved in meiotic DSB formation.                 |
| scaffold_100662.1             | AT1G06660 | JASON      | Mutant produces diploid male gametes                                      |
| scaffold_100916.1             | AT1G08880 | H2AX       | (Poorly aligned in <i>A. arenosa</i> ) Meiosis-specific histone           |
| Al_scaffold_0001_1062         | AT1G10710 | PHS1       | regulates recombination and pairing                                       |
| fgenes2_kg.1_1185_AT1G10930.1 | AT1G10930 | RECQ4A     | DNA damage response, suppression of hom. recombination.                   |
| scaffold_102523.1             | AT1G22260 | ZYP1a      | SC transverse filament protein                                            |
| scaffold_102525.1             | AT1G22275 | ZYP1b      | SC transverse filament protein                                            |
| scaffold_103117.1             | AT1G27900 |            | (Poorly aligned in <i>A. arenosa</i> ) predicted - DSB formation/repair   |
| fgenes2_kg.1_3543_AT1G34355.1 | AT1G34355 | PS1        | Mutant produces 2N pollen (Meiosis II defect)                             |
| fgenes2_kg.1_3636_AT1G35530.1 | AT1G35530 | FANCM      | helicase - limits meiotic crossover formation.                            |
| Al_scaffold_0001_4789         | AT1G53490 | HEI10      | Belongs to a group of ZMM proteins well conserved among species           |
| scaffold_704114.1             | AT1G54690 | HTA3       | (Poorly aligned in <i>A. arenosa</i> ) HTA3, a histone H2A protein.       |
| Al_scaffold_0002_448          | AT1G60930 | RECQ4B     | Involved in homologous recombination                                      |
| fgenes2_kg.2_87_AT1G63990.1   | AT1G63990 | AtSPO11-2  | DSB induction, Required for meiotic recombination.                        |
| scaffold_201325.1             | AT1G66170 | MMD1       | DNA binding, male meiosis, microsporogenesis                              |
| scaffold_201546.1             | AT1G67370 | ASY1       | Chiasma assembly                                                          |
| scaffold_202694.1             | AT1G77320 | MEI1       | Mutant defective in meiosis and produces abnormal microspores.            |
| fgenes2_kg.2_2033_AT1G77390.1 | AT1G77390 | CYCA1;2    | core cell cycle gene involved in meiosis II                               |
| scaffold_202722.1             | AT1G77600 |            | Homologous to animal sister chromatid cohesion protein PDS5               |
| scaffold_303391.1             | AT2G06510 | RPA1A      | (Poorly aligned in <i>A. arenosa</i> ) meiosis I in pollen mother cells.  |
| fgenes1_pg.C_scaffold_400806  | AT2G27170 | SMC3       | Member of the cohesin complex, partner of SMC1                            |
| fgenes1_pg.C_scaffold_4001300 | AT2G31970 | RAD50      | Involved in double strand break repair.                                   |
| scaffold_403468.1             | AT2G45280 | ATRAD51C   | (Poorly aligned in <i>A. arenosa</i> ) RAD51 homolog, DNA repair          |
| fgenes2_kg.4_2929_AT2G46980.2 | AT2G46980 | ASY3       | ASY3, coiled-coil domain protein required for normal meiosis.             |
| scaffold_403776.1             | AT2G47980 | SCC3       | monopolar orientation of the kinetochores during meiosis.                 |
| fgenes2_kg.3_209_AT3G02680.1  | AT3G02680 | NBS1       | DNA repair and meiotic recombination protein                              |
| fgenes2_kg.3_245_AT3G02980.1  | AT3G02980 | MCC1       | required in meiosis for normal chiasma number and distribution            |
| fgenes2_kg.3_538_AT3G05480.1  | AT3G05480 | RAD9       | DNA repair and homologous recombination                                   |
| Al_scaffold_0003_1340         | AT3G13170 | AtSPO11-1  | DSB induction, Required for meiotic recombination.                        |
| fgenes2_kg.3_2059_AT3G18524.1 | AT3G18524 | MSH2       | MutS-homolog, required for normal levels of recombination in yeast        |
| fgenes2_kg.3_2137_AT3G19210.1 | AT3G19210 | ATRAD54    | RAD54, functions in DNA repair via homologous recombination.              |
| fgenes2_kg.3_2273_AT3G20475.1 | AT3G20475 | MSH5       | MutS-homolog, required for normal levels of recombination in yeast        |
| scaffold_302741.1             | AT3G22880 | DMC1       | (Poorly aligned in <i>A. arenosa</i> ) Chiasma assembly / DNA repair      |
| fgenes2_kg.3_2716_AT3G25100.1 | AT3G25100 | CDC45      | Required for normal meiosis                                               |
| fgenes1_pm.C_scaffold_5000623 | AT3G43210 | TETRASPORE | Required for cytokinesis in pollen.                                       |
| fgenes1_pm.C_scaffold_5000964 | AT3G48190 | ATM        | homolog of human ataxia telangiectasia mutated                            |
| fgenes1_pm.C_scaffold_5001305 | AT3G52115 | AtCOM1     | Sae2 like, DNA repair                                                     |
| fgenes1_pm.C_scaffold_5001543 | AT3G54670 | SMC1       | member of cohesin complex.                                                |
| scaffold_502896.1             | AT3G57300 | INO80      | SWI/SNF ATPase. Positive regulator of homologous recombination            |
| fgenes2_kg.6_43_AT4G00020.1   | AT4G00020 | BRCA2A     | Ortholog of BRCA2. Essential at meiosis.                                  |
| scaffold_604079.1             | AT4G02070 | MSH6       | Homolog of MSH6                                                           |
| scaffold_603241.1             | AT4G09140 | MLH1       | Encodes protein similar to Mut1 DNA mismatch repair protein.              |
| fgenes2_kg.7_2921_AT4G14220.1 | AT4G14220 | RHF1A      | RING-type E3 ubiquitin ligase implicated in gametogenesis.                |
| fgenes2_kg.7_2572_AT4G17380.1 | AT4G17380 | MSH4       | meiosis-specific member of MutS-homolog family.                           |
| fgenes1_pm.C_scaffold_7001736 | AT4G20900 | MS5        | In ms5 mutants, pollen tetrads undergo an extra round of division         |
| scaffold_702296.1             | AT4G21270 | ATK1       | kinesin-like motor protein heavy chain involved in spindle formation      |
| fgenes2_kg.7_2002_AT4G22970.1 | AT4G22970 | ESP        | Encodes a separase (ESP)                                                  |
| fgenes2_kg.7_1706_AT4G25540.1 | AT4G25540 | MSH3       | DNA mismatch repair                                                       |
| fgenes2_kg.7_1273_AT4G29170.1 | AT4G29170 | ATMND1     | might play a role in DSB repair during meiosis.                           |
| fgenes2_kg.7_1096_AT4G30870.1 | AT4G30870 | MUS81      | Associates with noninterfering crossovers                                 |
| fgenes1_pm.C_scaffold_7000779 | AT4G32200 | ASY2       | (Poorly aligned in <i>A. arenosa</i> ) homolog of ASY1                    |
| fgenes2_kg.6_43_AT4G00020.1   | AT5G01630 | BRCA2B     | Ortholog of BRCA2. Essential at meiosis.                                  |
| fgenes1_pm.C_scaffold_6000400 | AT5G05490 | SYN1       | Encodes a RAD21-like gene essential for meiosis.                          |
| fgenes2_kg.6_735_AT5G07660.1  | AT5G07660 | SMC6a      | SMC5/6 complex; sister chromatid alignment, hom. recombination            |
| scaffold_601585.1             | AT5G15540 | SCC2       | Encodes Adherin SCC2. Sister chromatid cohesion                           |
| fgenes1_pm.C_scaffold_6001261 | AT5G15920 | SMC5       | SMC5/6 complex; sister chromatid alignment, hom. recombination            |
| scaffold_601664.1             | AT5G16270 | SYN4       | Rad21 homolog                                                             |
| fgenes2_kg.6_1963_AT5G19400.1 | AT5G19400 | SMG7       | Required for exit from meiosis.                                           |
| fgenes2_kg.6_2181_AT5G22000.1 | AT5G22000 | RHF2A      | allows the mitoses associated with gametogenesis                          |
| Al_scaffold_0006_2318         | AT5G24280 | GMI1       | Involved in somatic homologous recombination.                             |
| scaffold_703887.1             | AT5G40820 | ATR        |                                                                           |
| fgenes2_kg.8_17_AT5G47690.1   | AT5G47690 | PDS5-like  | Homologous to animal sister chromatid cohesion protein PDS5               |
| fgenes1_pm.C_scaffold_8000591 | AT5G48390 | AtSPO22    | Involved in crossover formation.                                          |
| fgenes2_kg.8_753_AT5G48720.1  | AT5G48720 | XRI1       | resolution of meiotic recombination intermediates                         |
| fgenes2_kg.8_1020_AT5G51330.1 | AT5G51330 | DYAD/SW1   | sister chromatid cohesion and meiotic chromosome organization             |
| fgenes2_kg.271_2_AT5G52290.1  | AT5G52290 | SHOC1      | (Poorly aligned in <i>A. arenosa</i> ) Mutants have defects in meiosis.   |
| fgenes2_kg.8_1327_AT5G54260.1 | AT5G54260 | MRE11      | DNA repair / meiotic recombination protein, MRE11 complex                 |
| scaffold_8021318.1            | AT5G57450 | XRCC3      | (Poorly aligned in <i>A. arenosa</i> ) homologous recombination / repair. |
| fgenes2_kg.8_2121_AT5G61460.1 | AT5G61460 | SMC6b      | SMC5/6 complex; sister chromatid alignment, hom. recombination            |
| fgenes2_kg.8_2400_AT5G63920.1 | AT5G63920 | TOP3a      | Encodes topoisomerase 3alpha                                              |
| Al_scaffold_0008_3317         | AT5G66130 | RAD17      | regulation of DNA damage repair and homologous recombination.             |

Table S5 notes: Meiosis-related genes in TAIR10 with *A. lyrata* gene names and locations in the *A. lyrata* genome assembly (from Plant Ensembl). Genes for which we have no data from *A. arenosa* due to poor read coverage are in grey.

**Table S6. Top differentiating SNPs resulting in amino acid substitutions in selected meiosis genes.**

| Locus | Tetraploid High Frequency |        |            | Diploid High Frequency |        |            |
|-------|---------------------------|--------|------------|------------------------|--------|------------|
|       | substitution              | excess | domain     | substitution           | excess | domain     |
| PRD3  | S103Y                     | 0.70   | (none)     | V851L                  | -0.70  | (none)     |
|       | T181S                     | 0.73   |            |                        |        |            |
|       | K188E                     | 0.72   |            |                        |        |            |
|       | V287G                     | 0.55   |            |                        |        |            |
| Zyp1a | E299K                     | 0.95   | (none)     | (none)                 |        |            |
|       | V308M                     | 0.95   |            |                        |        |            |
|       | I323M                     | 0.71   |            |                        |        |            |
|       | E358A                     | 0.98   |            |                        |        |            |
|       | G361S                     | 0.98   |            |                        |        |            |
|       | T392A                     | 0.53   |            |                        |        |            |
|       | E419V                     | 0.98   |            |                        |        |            |
|       | N427S                     | 0.98   |            |                        |        |            |
|       | L428V                     | 1.00   |            |                        |        |            |
|       | N452K                     | 0.98   |            |                        |        |            |
|       | K454E                     | 0.98   |            |                        |        |            |
|       | A460V                     | 0.98   |            |                        |        |            |
|       | A605E                     | 0.94   |            |                        |        |            |
|       | N748S                     | 0.66   |            |                        |        |            |
|       | S771A                     | 0.98   |            |                        |        |            |
| E797D | 0.77                      |        |            |                        |        |            |
| Zyp1b | D100G                     | 0.83   | (none)     | S232A                  | -0.56  | (none)     |
|       | Q190R                     | 0.95   |            | K310N                  | -0.72  |            |
|       | K789R                     | 0.83   |            | D341E                  | -0.55  |            |
|       |                           |        |            | F347Y                  | -0.55  |            |
| ASY1  | K40E                      | 0.77   | HORMA      | K405N                  | -0.66  | (none)     |
|       | F272S                     | 0.86   |            |                        |        |            |
|       | R313H                     | 0.84   |            |                        |        |            |
| PDS5  | T300I                     | 0.88   | ARM repeat | V124A                  | -0.88  | ARM repeat |
|       | T335R                     | 0.89   | ARM repeat | C473W                  | -0.75  | ARM repeat |
|       | A341V                     | 0.88   | ARM repeat | T774I                  | -0.70  |            |
|       | S527Y                     | 0.86   | ARM repeat | P1229T                 | -0.83  |            |
|       | A588G                     | 0.92   | ARM repeat |                        |        |            |
|       | Q841E                     | 0.89   |            |                        |        |            |
|       | E949K                     | 0.91   |            |                        |        |            |
|       | E983Q                     | 0.88   |            |                        |        |            |
|       | V1102A                    | 0.92   |            |                        |        |            |
|       | E1199A                    | 0.92   |            |                        |        |            |

|      |       |      |        |        |       |        |
|------|-------|------|--------|--------|-------|--------|
| SYN1 | A274V | 0.89 | (none) | (none) |       |        |
|      | A294T | 0.88 |        |        |       |        |
|      | E344D | 0.89 |        |        |       |        |
|      | R371H | 0.88 |        |        |       |        |
|      | Q388H | 0.92 |        |        |       |        |
|      | D454G | 0.89 |        |        |       |        |
| ASY3 | Q16H  | 0.84 | (none) | I44L   | -0.63 | (none) |
|      | T54P  | 0.94 |        | L172Q  | -0.95 |        |
|      | L96S  | 0.98 |        | Q380H  | -0.97 |        |
|      | N117T | 0.77 |        | R389Q  | -0.63 |        |
|      | Q133P | 0.95 |        | Q391K  | -0.63 |        |
|      | D193V | 0.97 |        | I433V  | -0.98 |        |
|      | P208T | 0.94 |        | A467V  | -0.69 |        |
|      | T265I | 0.98 |        | M482T  | -0.94 |        |
|      | L268V | 0.98 |        | N494T  | -0.94 |        |
|      | A275T | 0.98 |        | E511D  | -0.95 |        |
|      | N298D | 0.97 |        | K530N  | -0.98 |        |
|      | A567S | 0.95 |        | S538P  | -1.00 |        |
|      |       |      |        | G556S  | -0.69 |        |

Table S6 notes: Locus = Meiosis gene locus present on overlap list of windows found both among 0.5% outliers for 2dSFS and the residuals. All loci were annotated in the *A. lyrata* v1 genome annotation, except *Zyp1a*, which was manually curated from protein homology with *Arabidopsis thaliana* and the putative local duplicate, *Zyp1b*. Substitution = predicted amino acid change from *A. lyrata* v1 genome sequence at the locus. Excess = minor allele frequency in tetraploids minus minor allele frequency in diploids. Domain = if the substitution occurs in a conserved or otherwise identified domain (from Pfam and SMART searches), it is here indicated.

## SUPPLEMENTAL METHODS

### De novo sequencing of diploid *A. arenosa*

One diploid, SN8, was sequenced on three paired-end Illumina HiSeq lanes (as above) at 101 bp read length (21.2GB raw sequence). Reads were corrected with the kmer correction software SOAP Correction (<http://soap.genomics.org.cn/about.html>) and assembled with SOAP de novo 2 [47]. Multiple assemblies were compared, using a range of kmer lengths (25mer to 101mer) and an optimal assembly was chosen based on a combination of greatest mean contig size and total assembly length. Next, fragments smaller than 200bp were excluded and the resultant assembly was aligned with LASTZ [48] to the repeatmasked *Lyrata*1.0 genome [16]. Synteny of the two genomes in the regions of interest was determined by manual curation, visualized in IGV [49, 50].

**Genomic analysis.** Genome-wide polymorphism data from diploids and tetraploids were combined using custom PERL and R scripts. Sites with 1X or greater coverage in all individuals were retained for subsequent analysis. All analyses were implemented over 55,570 100-SNP sliding windows across each of the eight reference chromosome sequences, as described below. We calculated  $F_{ST}$  between diploids and tetraploids following [17]. To scan the genome for adaptive differentiation between diploid and tetraploid samples, we used two approaches: (1) a composite likelihood ratio test of the diploid-tetraploid two-dimensional Site Frequency Spectrum (2dSFS), and (2) a scan for regions with high allele frequency differentiation between diploids and tetraploids, but low diversity within tetraploids. (1) We implemented a composite likelihood ratio test of the 2dSFS, following the framework of [17, 51]. Briefly, we calculated the likelihoods of observing  $k$  SNPs at frequency  $i$  in the diploid sample and frequency  $j$  in the tetraploid sample, over all  $i$  and  $j$ , and compared the ratio of composite likelihoods for window-specific versus genome-wide models. The windows with the highest 0.5% ratios were retained as candidate selected regions. (2) To test for deviations from expected patterns of tetraploid diversity and divergence between diploids and tetraploids, we calculated nucleotide diversity in tetraploids and average allele frequency difference between diploids and tetraploids for each window. We then calculated the linear regression fit to these data. Residuals were calculated based on vertical deviations from the regression line fit and were used to identify outliers with the most negative regression values, which in this analysis identified regions with excess divergence relative to diversity, compared to the genome-wide relationship. Finally, we took the intersection of the 0.5% outliers from 1) and 2), above, for our final set of candidate selected regions. Candidate selected genes were identified by overlap between *A. lyrata* reference annotations and outlier windows. Gene functions/identities were determined by orthology with *A. thaliana* loci. All genome-wide analyses were performed using custom R scripts, implemented in R version 2.15.0. Annotations were based on the *A. lyrata* v1.0 release and hand edited for the eight meiosis genes as needed using Geneious R6.1 and IGV. Top differentiating SNPs resulting in amino acid substitutions in selected meiosis genes were predicted with SnpEff [52] and manually confirmed.

## SUPPLEMENTAL REFERENCES

47. Luo, R., Liu, B., Xie, Y., Li, Z., Huang, W., Yuan, J., He, G., Chen, Y., Pan, Q., Liu, Y., *et al.* (2012). SOAPdenovo2: an empirically improved memory-efficient short-read de novo assembler. *GigaScience* 1, 18-24.
48. Harris, R. S. (2007). Improved pairwise alignment of genomic DNA. PhD Dissertation, The Pennsylvania State University.
49. Robinson, J. T., Thorvaldsdóttir, H., Winckler, W., Guttman, M., Lander, E. S., Getz, G., Mesirov, J. P.. (2011). Integrative genomics viewer. *Nat. Biotech.* 29, 24-26.
50. Thorvaldsdóttir, H., Robinson, J. T., and Mesirov, J. P. (2013). Integrative Genomics Viewer (IGV): high-performance genomics data visualization and exploration. *Briefings in Bioinformatics* 14, 178-192.
51. Nielsen, R., Williamson, S., Kim, Y., Hubisz, M. J., Clark, A. G., and Bustamante, C. (2005). Genomic scans for selective sweeps using SNP data. *Genome Res.* 15, 1566-1575.
52. Cingolani, P., Platts, A., Wang, L., Coon, M., Nguyen, T., Wang, L., Land, S. J., Lu, X., Ruden,



D. M. (2012). A program for annotating and predicting the effects of single nucleotide polymorphisms, SnpEff: SNPs in the genome of *Drosophila melanogaster* strain w1118; iso-2; iso-3. *Fly* Apr-Jun;6(2):80-92.
